# Supplementary material
Source: MDPI journal article supplement (https://www.mdpi.com/2073-4344/12/10/1222)
Supplement: s1 [file s1]

Supplementary Data

# Catalytic Performance of Alumina-Supported Cobalt Carbide Catalysts for Low-Temperature Fischer–Tropsch Synthesis

Zahra Gholami <sup>1,\*</sup>, Zdeněk Tišler <sup>1</sup>, Eliška Svobodová <sup>1</sup>, Ivana Hradecká <sup>1</sup>, Nikita Sharkov <sup>1</sup> and Fatemeh Gholami <sup>2</sup>

<sup>1</sup> ORLEN UniCRE, a.s., 436 70 Litvínov, Czech Republic

<sup>2</sup> New Technologies-Research Centre, University of West Bohemia, 301 00 Plzeň, Czech Republic

\* Correspondence: zahra.gholami@orlenunicre.cz; Tel: +420-731-576-893

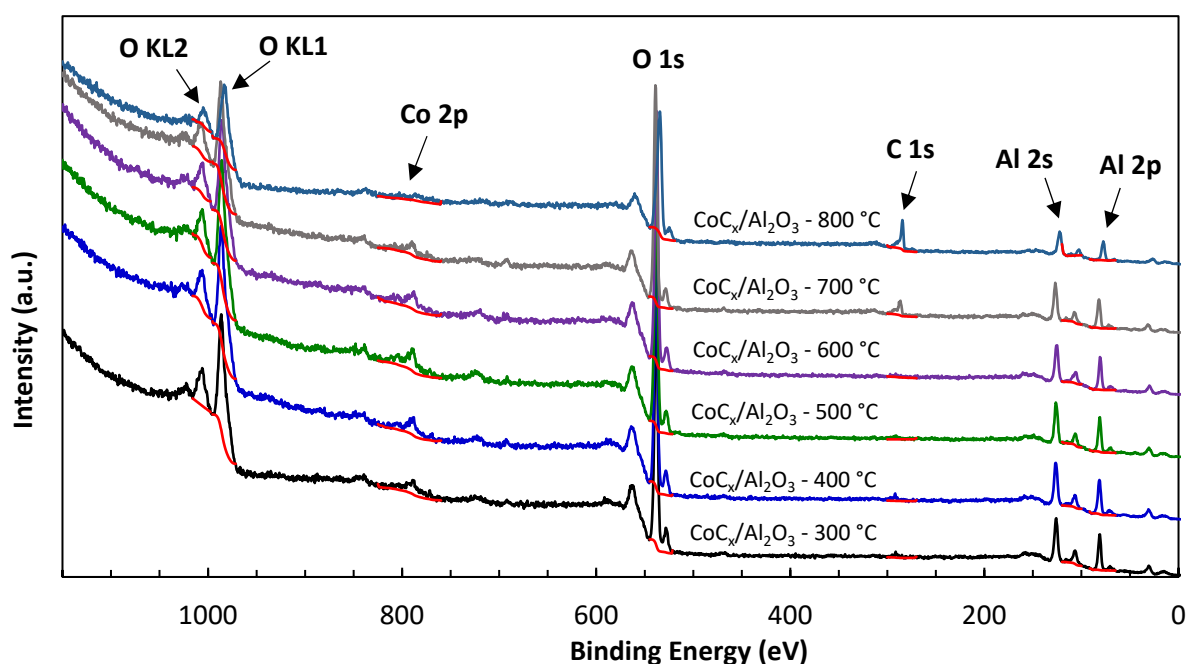

**Figure S1.** Survey XPS spectra scan of carbide catalysts.

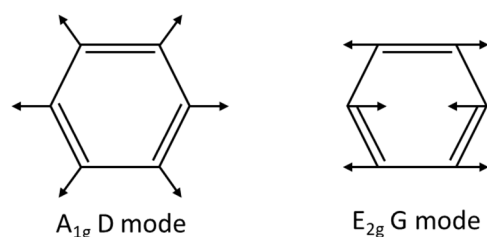

**Figure S2.** Carbon motions in the D and G modes [45].
